# Supplementary material for: Leishmania donovani infection induce differential miRNA expression in CD4+ T cells
Source: PubMed Central journal article supplement (PMC7044172; doi:10.1038/s41598-020-60435-2), 2020-02-26
Supplement: 41598_2020_60435_MOESM1_ESM.pdf [file 41598_2020_60435_MOESM1_ESM.pdf]

***Leishmania donovani* infection induce differential miRNA expression in CD4+ T cells.**

Vinod Kumar<sup>1</sup>, Sushmita Das<sup>2</sup>, Ajay Kumar<sup>1</sup>, Neeraj Tiwari<sup>5</sup>, Ashish Kumar<sup>3</sup>, Kumar Abhishek<sup>1</sup>,  
Abhishek Manda<sup>1</sup>, Manjay Kumar<sup>1</sup>, Taj Shafi<sup>1</sup>, Tanvir Bamra<sup>1</sup>, Rakesh Kumar Singh<sup>5</sup>, Vijayakumar  
Sarvanan<sup>4</sup>, Abhik Sen<sup>1</sup>, Pradeep Das<sup>1\*</sup>

<sup>1</sup>Division of Molecular Biology, Rajendra Memorial Research Institute of Medical Sciences,  
Agamkuan, Patna, Bihar, India

<sup>2</sup>Department of Microbiology, All India Institute of Medical Sciences, Phulwarisharif, Patna  
Bihar, India

<sup>3</sup>Division of Biochemistry, Rajendra Memorial Research Institute of Medical Sciences,  
Agamkuan, Patna, Bihar, India

<sup>4</sup>Division of Bioinformatics, Rajendra Memorial Research Institute of Medical Sciences,  
Agamkuan, Patna, Bihar, India

<sup>5</sup>Department of Biochemistry, Institute of Science, Banaras Hindu University, Varanasi-221005

**\*Corresponding Author**

Dr. Pradeep Das

Director

Mailing Address: Rajendra Memorial Research Institute of Medical Sciences,  
Agamkuan, Patna- 800007, Bihar, India

Telephone No. +91-612-2631565

Fax No. +91-612-2634379

E-mail ID: [drpradeep.das@gmail.com](mailto:drpradeep.das@gmail.com)

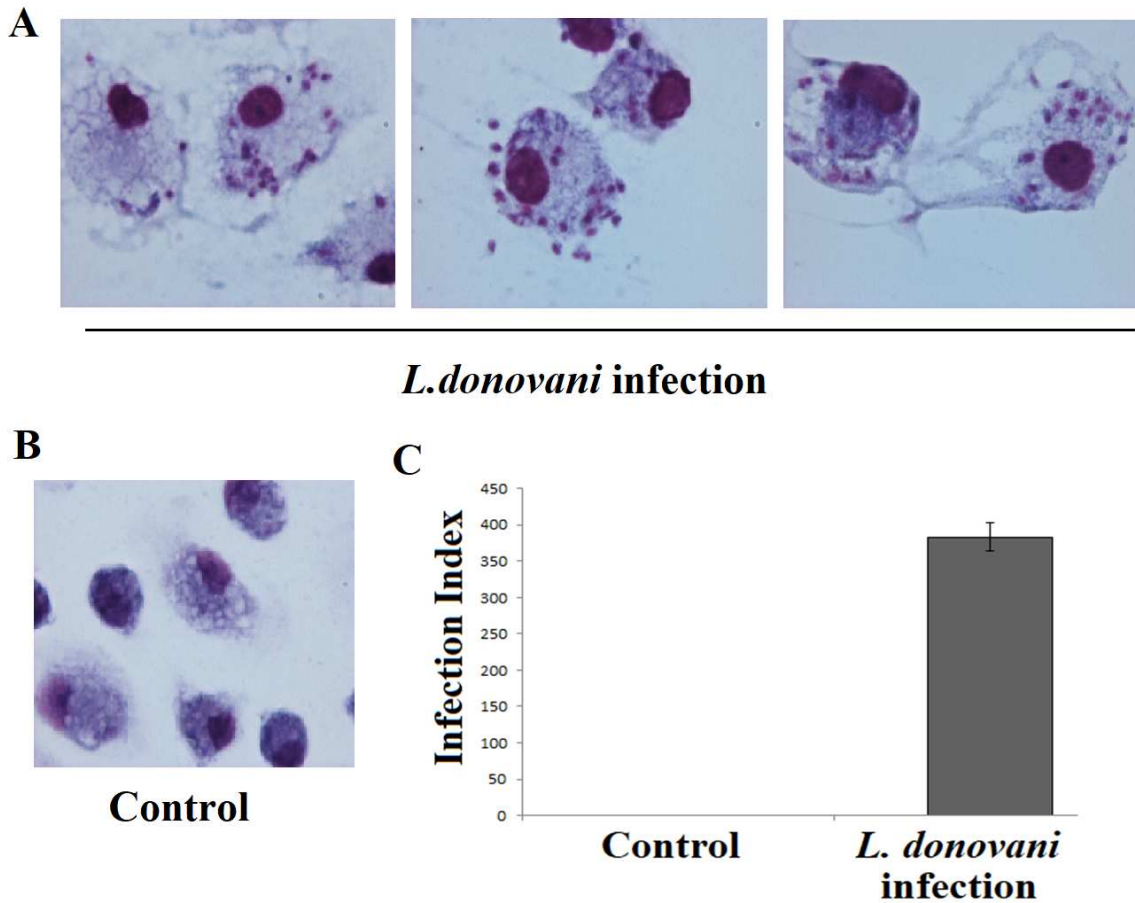

**Supplementary Figure 1.** Peritoneal macrophages of BALB/c mice were infected with *L. donovani*, uninfected macrophage were taken as control. After 6h of interaction, uninfected parasites were washed and incubated for 24hrs in 5% CO<sub>2</sub> atmosphere. After 24hrs, cells were stained with May-Grunwald, followed by Geimsa staining. (A) The infected macrophages from three different microscopic fields were taken. (B) Control macrophages without infection, (C) Infected cells were counted and results are expressed as infection index. Infection index was measured as mean of infected cells X the mean number of parasites per infected cells. Bar represent mean ± SE of the three independent experiments.

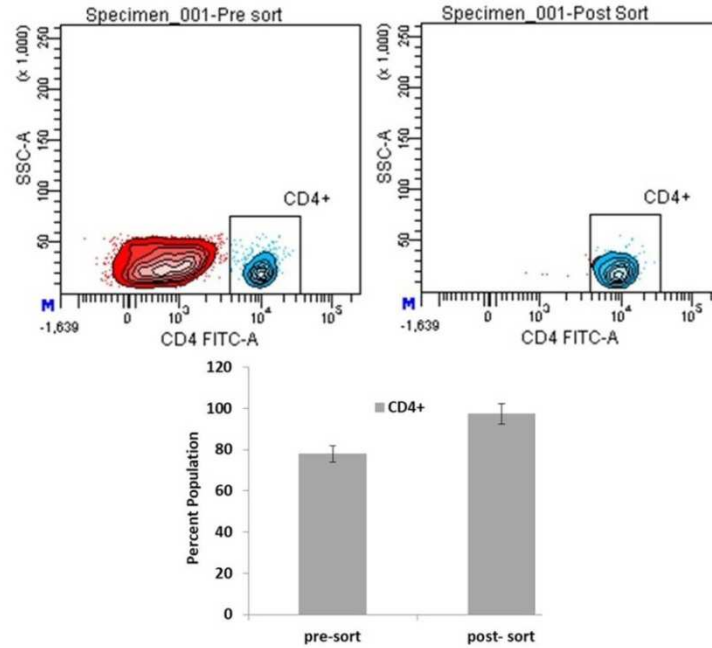

**Supplementary Figure 2.** (A) Flow cytometry analysis for measurement of CD4+ T cell before and after sorting (B). Graphical representation of CD4+ T cell population.

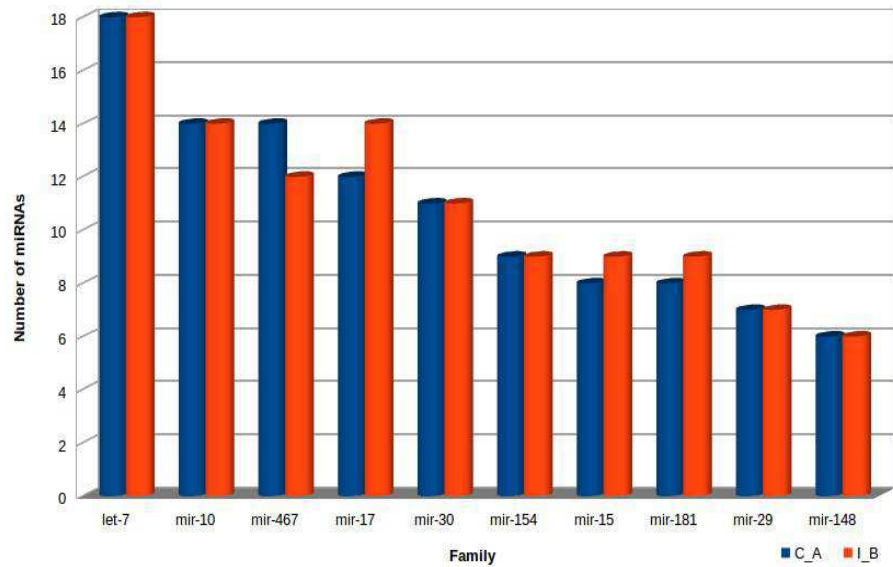

**Supplementary Figure 3.** Family analysis of conserved miRNA

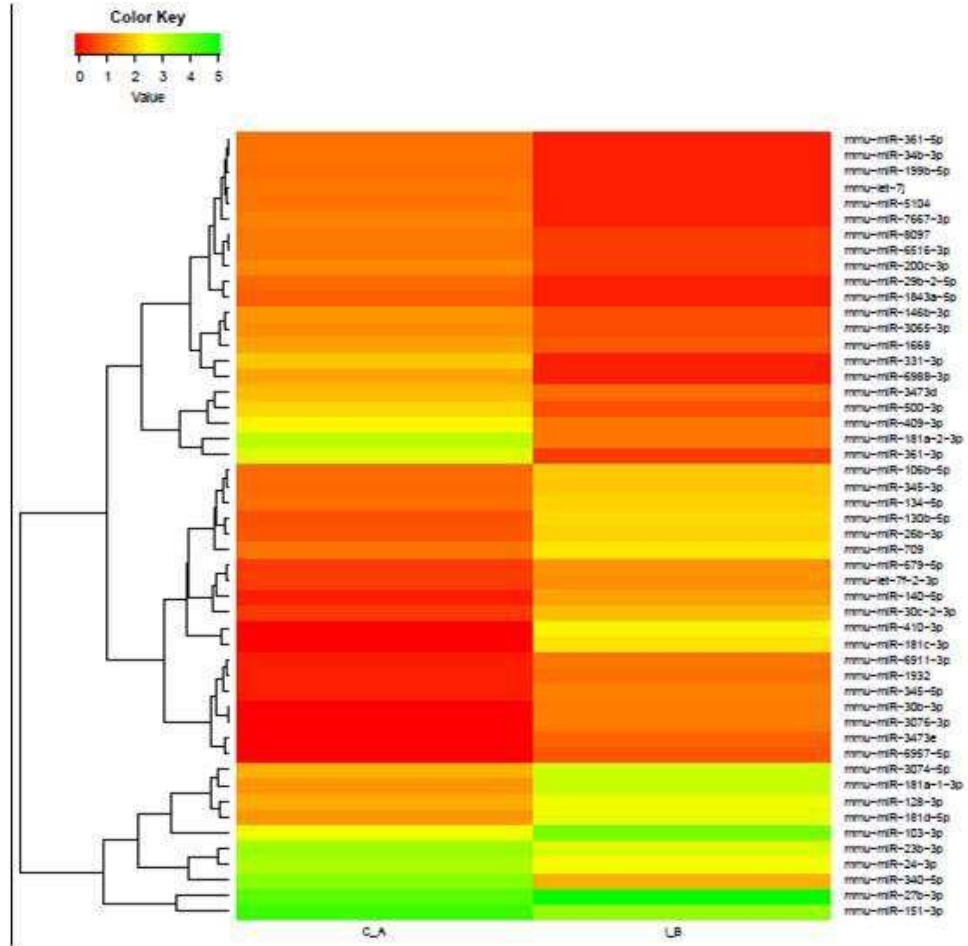

**Supplementary Figure 4:** Heatmap of known miRNA

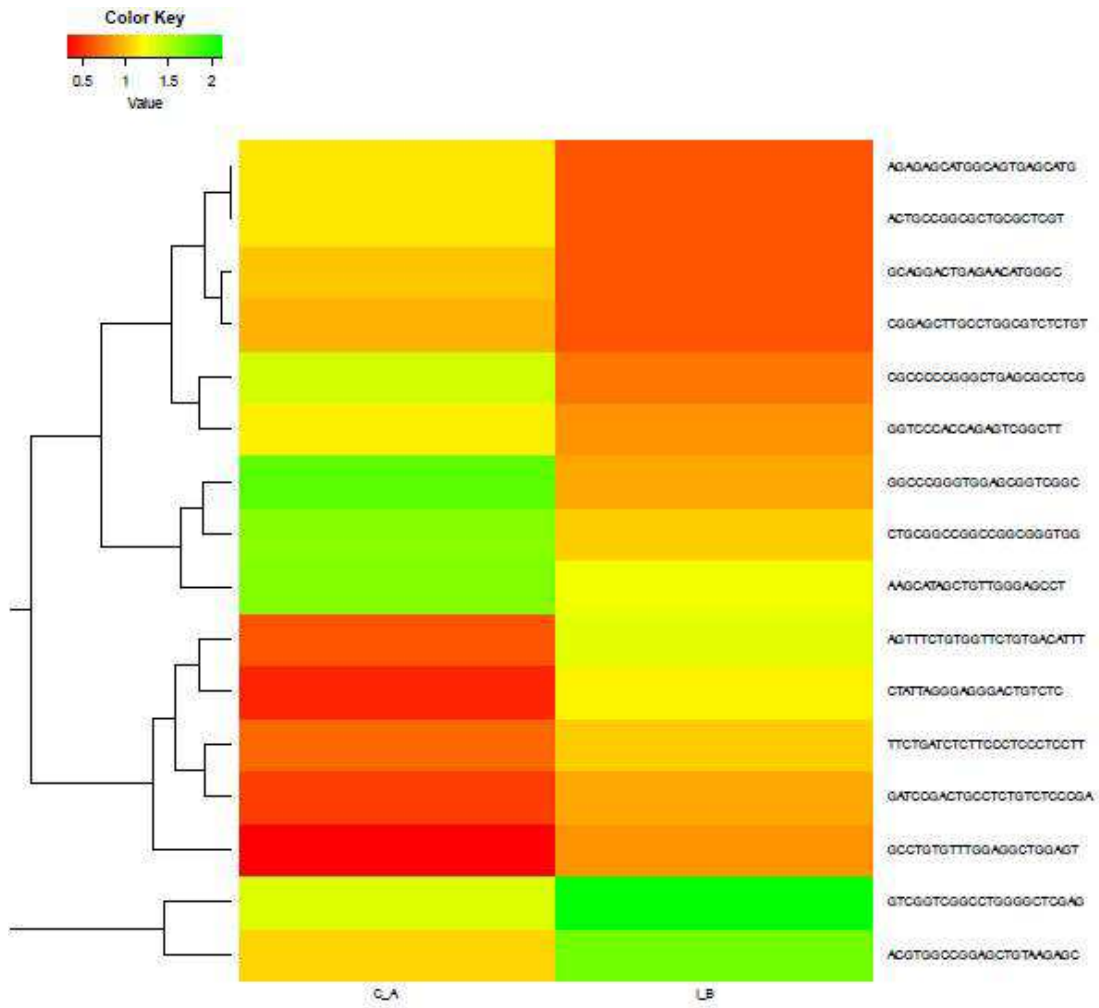

Supplementary Figure 5. Heatmap of novel miRNA

**Supplementary Table-1: List of primers used in this study**

| S. no | List of Up regulated miRNA          | Stem Loop Primer Sequence                                     | Forward Primer Seq         |
|-------|-------------------------------------|---------------------------------------------------------------|----------------------------|
| 1     | let-7e-3p                           | 5'GTTGGCTCTGGTGCA GGGTCCGAGGTATTCGCACCA G AGCCAAC GGAAAG 3'   | 5'ACAAGUCUAUACGGCC UC 3'   |
| 2     | miR-10a-3p                          | 5'GTTGGCTCTGGTGCA GGGTCCGAGGTATTCGCACCA G AGCCAAC TATTCC 3'   | 5'CCCGGCA CAAAUUCGUA UC 3' |
| 3     | miR-134-5p                          | 5'GTTGGCTCTGGTGCA GGGTCCGAGGTATTCGCACCA G AGCCAAC CCCCUC 3'   | 5'CGAUGAUGUGACUGG UUG 3'   |
| 4     | miR-193a-3p                         | 5'GTTGGCTCTGGTGCA GGGTCCGAGGTATTCGCACCA G AGCCAAC ACUGGG 3'   | 5'CA CUCUAACUGGCCUA CA 3'  |
| 5     | miR-212-3p                          | 5'GTTGGCTCTGGTGCA GGGTCCGAGGTATTCGCACCA G AGCCAAC UGGCCG 3'   | 5'CCGAUGUAACA GUCUC CA 3'  |
| 6     | miR-296-5p                          | 5'GTTGGCTCTGGTGCA GGGTCCGAGGTATTCGCACCA G AGCCAAC ACAGGA 3'   | 5'UAUUUUUAGGGCCCCC CU 3'   |
| 7     | miR-33-5p                           | 5'GTTGGCTCTGGTGCA GGGTCCGAGGTATTCGCACCA G AGCCAAC UGCAA U 3'  | 5'CGAAUCGUGCAUUGUA GU 3'   |
| 8     | miR-431-5p                          | 5'GTTGGCTCTGGTGCA GGGTCCGAGGTATTCGCACCA G AGCCAAC UGCAUG 3'   | 5'AACUUAUGUCUUGCAG GC 3'   |
| 9     | miR-5128                            | 5'- GTCGTATCCA GTGCA GGGTCCGAGGTATTCGCACTG GATACGACAGCCAT 3'  | 5'GACCCGCAAAAGGGG CAG 3'   |
| 10    | miR-5620-3p                         | 5'- GTCGTATCCA GTGCA GGGTCCGAGGTATTCGCACTG GATACGACCA CAGT 3' | 5'GGA GCTACGAGGCAG GGG 3'  |
| 11    | miR-574-5p                          | 5'- GTCGTATCCA GTGCA GGGTCCGAGGTATTCGCACTG GATACGACACAC 3'    | 5'GCCGCGTGAGTGTGT GTG 3'   |
| 12    | miR-690                             | 5'- GTCGTATCCA GTGCA GGGTCCGAGGTATTCGCACTG GATACGACTTTGGT 3'  | 5'CCGCGAAAAGGCTAG GCT 3'   |
| 13    | miR-6994-5p                         | 5'- GTCGTATCCA GTGCA GGGTCCGAGGTATTCGCACTG GATACGACTCACCG 3'  | 5'GCGGCAACAAAGGTG GGT 3'   |
| 14    | miR-7093-3p                         | 5'- GTCGTATCCA GTGCA GGGTCCGAGGTATTCGCACTG GATACGACCTGCA G 3' | 5'GCGCGCTTTCCATCT GTC 3'   |
| 15    | miR-7235-5p                         | 5'- GTCGTATCCA GTGCA GGGTCCGAGGTATTCGCACTG GATACGACGCCCA G 3' | 5'CCAAACGGAGGGAGG GGT 3'   |
| 16    | miR-7673-5p                         | 5'- GTCGTATCCA GTGCA GGGTCCGAGGTATTCGCACTG GATACGACCATTC 3'   | 5'GGCCGGTTTGA CTGA GAG 3'  |
| 17    | miR-7a-1-3p                         | 5'- GTCGTATCCA GTGCA GGGTCCGAGGTATTCGCACTG GATACGACTTTGGC 3'  | 5'CGCGCGCAACAAAAC ACA 3'   |
| 18    | miR-8096                            | 5'- GTCGTATCCA GTGCA GGGTCCGAGGTATTCGCACTG GATACGACTCTCTT 3'  | 5'AGACGTGGGCA CGGA AGC 3'  |
| 19    | miR-8094                            | 5'- GTCGTATCCA GTGCA GGGTCCGAGGTATTCGCACTG GATACGACTCTTCT 3'  | 5'CGCCGCAACUGA AGGACA 3'   |
|       | <b>List of down regulated miRNA</b> | <b>Stem Loop Primer Sequence</b>                              | <b>Forward Primer Seq</b>  |
| 1     | let 7j                              | 5'- GTCGTATCCA GTGCA GGGTCCGAGGTATTCGCACTG GATACGACATAACA 3'  | 5'GGCCCATGAGGTATTA GT 3'   |

|    |                           |                                                                           |                               |
|----|---------------------------|---------------------------------------------------------------------------|-------------------------------|
| 2  | miR-145a-5p               | 5'GTTGGCTCTGGTGCA GGGTCCGAGGTATTCGCACCA G AGCCAAC A GGGAU 3'              | 5'CAA GCUGUCCA GUUUU CC 3'    |
| 3  | miR-147-3p                | 5'GTTGGCTCTGGTGCA GGGTCCGAGGTATTCGCACCA G AGCCAAC UA GCAG 3'              | 5'AUGCUA GUGUGCGGA AAU 3'     |
| 4  | miR-181a-2-3p             | 5'- GTC GTA TCC AGT GCA GGG TCC GAG GTA TTC GCA CTG GAT ACG AC GGTA CA 3' | 5'AATTTAAACCACCGAC CGT 3'     |
| 5  | miR-18a-3p                | 5'GTTGGCTCTGGTGCA GGGTCCGAGGTATTCGCACCA G AGCCAAC CA GAAG 3'              | 5'CAAUCGA CUGCCCUAA GU 3'     |
| 6  | miR-23b-3p                | 5'GTTGGCTCTGGTGCA GGGTCCGAGGTATTCGCACCA G AGCCAACGGUAAU 3'                | 5'CAAUGCA UCACAUUGC CA 3'     |
| 7  | miR-322-5p                | 5'GTTGGCTCTGGTGCA GGGTCCGAGGTATTCGCACCA G AGCCAAC UCCAAA 3'               | 5'CGUAGUCA GCA GCAAU UC 3'    |
| 8  | miR-340-5p                | 5'- GTCGTATCCA GTGCA GGGTCCGAGGTATTCGCACTG GAT ACG AC AATCAG 3'           | 5'GCCCGCTTATAAA GCA AT 3'     |
| 9  | miR-3473f                 | 5'- GTCGTATCCA GTGCA GGGTCCGAGGTATTCGCACTG GATA CGA CCATCTC 3'            | 5'GCCCAACAAATAGGA C TG 3'     |
| 10 | miR-365-3p                | 5'GTTGGCTCTGGTGCA GGGTCCGAGGTATTCGCACCA G AGCCAACAUAAGG 3'                | 5'CGGA UCUA AUGCCCUU AA 3'    |
| 11 | miR-486a-3p               | 5'- GTCGTATCCA GTGCA GGGTCCGAGGTATTCGCACTG GATA CGA CATCCTG 3'            | 5'ATATATCGGGGCA GCT CA 3'     |
| 12 | miR-503-3p                | 5'- GTCGTATCCA GTGCA GGGTCCGAGGTATTCGCACTG GATA CGA CCCA GGC 3'           | 5'GGGCGA GAGTATTGTT TC 3'     |
| 13 | miR-615-3p                | 5'GTTGGCTCTGGTGCA GGGTCCGAGGTATTCGCACCA G AGCCAACAAGAGG 3'                | 5'UUA UAAUCCGA GCCUG GG 3'    |
| 14 | miR-7017-5p               | 5'- GTCGTATCCA GTGCA GGGTCCGAGGTATTCGCACTG GATA CGA CA CA GCC 3'          | 5'GCATACA GAGGGTTGT GA 3'     |
| 15 | miR-7655                  | 5'- GTCGTATCCA GTGCA GGGTCCGAGGTATTCGCACTG GATA CGA CTCTTA 3'             | 5' TATAAT CGGCCCA CGGAG 3'    |
| 16 | miR-8115                  | 5'GTTGGCTCTGGTGCA GGGTCCGAGGTATTCGCACCA G AGCCAACA GAGCC 3'               | 5'GUAA GUCCGAAUA GC AA 3'     |
| 17 | miR-93-3p                 | 5'- GTCGTATCCA GTGCA GGGTCCGAGGTATTCGCACTG GATA CGA CCGGGAA 3'            | 5'CATGGA CTGCTGAGCT A 3'      |
|    | <b>Endogenous Control</b> |                                                                           |                               |
| 1. | Sno-142                   | 5'GTTGGCTCTGGTGCA GGGTCCGAGGTATTCGCACCA G AGCCAACTTCCTC 3'                | 5'GCGGCGGGTCA GTGCC ACGTGT 3' |
| 1. |                           | <b>Universal Reverse Primer Seq.</b><br>5' GTGCA GGGTCCGAGG 3'            |                               |
